# Supplementary material for: A study of the effect of sonication time on the catalytic performance of layered WS2 from various sources
Source: Royal Society of Chemistry journal article supplement (doi:10.1039/c6cp07385a), 2017-01-01
Supplement: c6cp07385a1.pdf [file c6cp07385a1.pdf]

## SUPPORTING INFORMATION

# A Study of the Effect of Sonication Time on Catalytic Performance of Layered WS<sub>2</sub> from Various Sources

*Shi Xuan Leong,<sup>†</sup> Carmen C. Mayorga-Martinez,<sup>†</sup> Zdeněk Sofer,<sup>‡</sup> Jan Luxa,<sup>‡</sup> Shu Min Tan<sup>†</sup>,  
Martin Pumera<sup>\*†</sup>*

<sup>†</sup>Division of Chemistry & Biological Chemistry, School of Physical Mathematical Science,  
Nanyang Technological University, Singapore 637371, Singapore

<sup>‡</sup>Department of Inorganic Chemistry, University of Chemistry and Technology Prague,  
Technická 5, 166 28, Prague 6, Czech Republic

\* Fax: (+65) 6791 1961. E-mail address: [pumera@ntu.edu.sg](mailto:pumera@ntu.edu.sg)

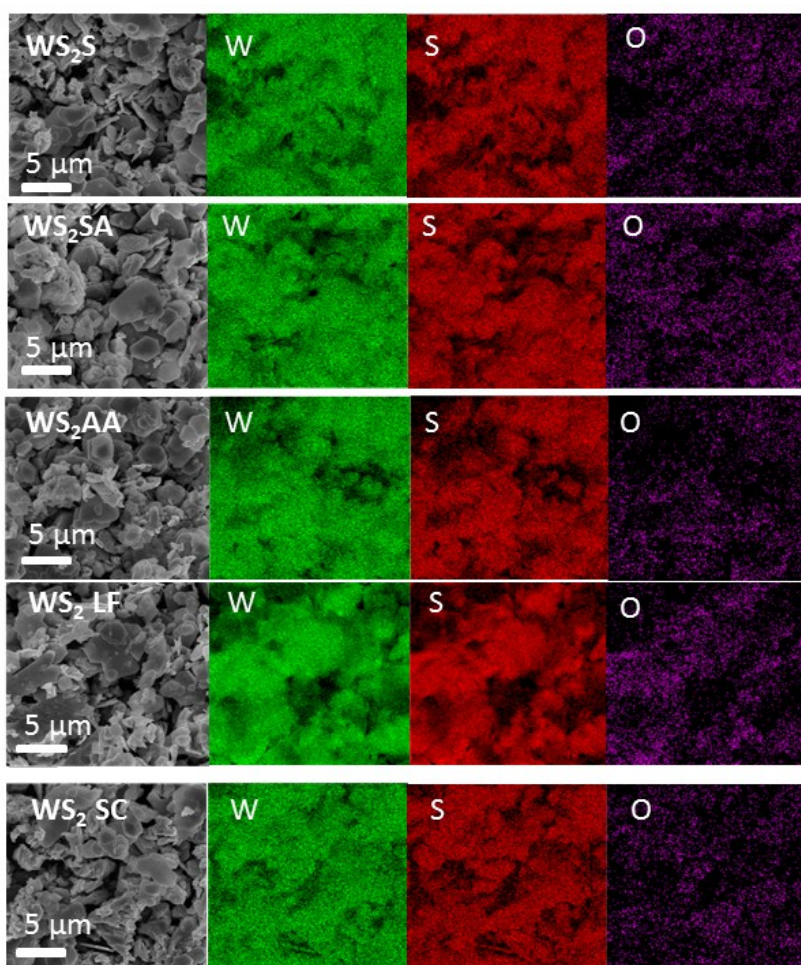

**Figure S1.** SEM micrographs and EDS maps of elemental distribution of WS<sub>2</sub> samples obtained from different suppliers.

**Table S1.** The results of X-ray fluorescence (XRF) analysis of WS<sub>2</sub> from different suppliers.

| Sample             | W (wt.%) | S (wt.%) | V (ppm) | Fe (ppm) | K (ppm) | Y (ppm) |
|--------------------|----------|----------|---------|----------|---------|---------|
| WS <sub>2</sub> S  | 72.19    | 27.80    |         |          |         |         |
| WS <sub>2</sub> SA | 71.82    | 28.16    |         | 90       |         |         |
| WS <sub>2</sub> AA | 71.85    | 28.13    |         |          |         | 45      |
| WS <sub>2</sub> LF | 72.26    | 27.67    |         | 54       |         |         |
| WS <sub>2</sub> SC | 72.03    | 27.95    | 44      | 38       |         |         |

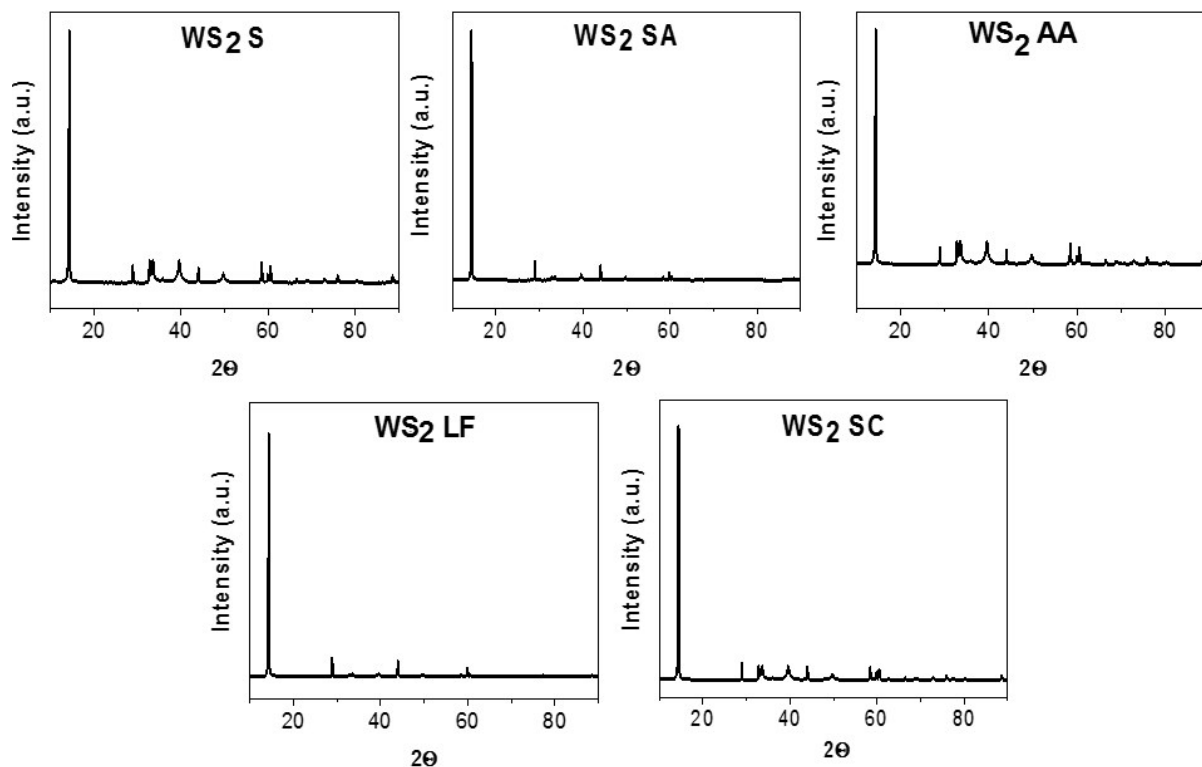

**Figure S2.** XRD diffractograms of various WS<sub>2</sub> samples. Small lines in the bottom part represent reference data taken from PDF database (PDF# 04-004-0730).

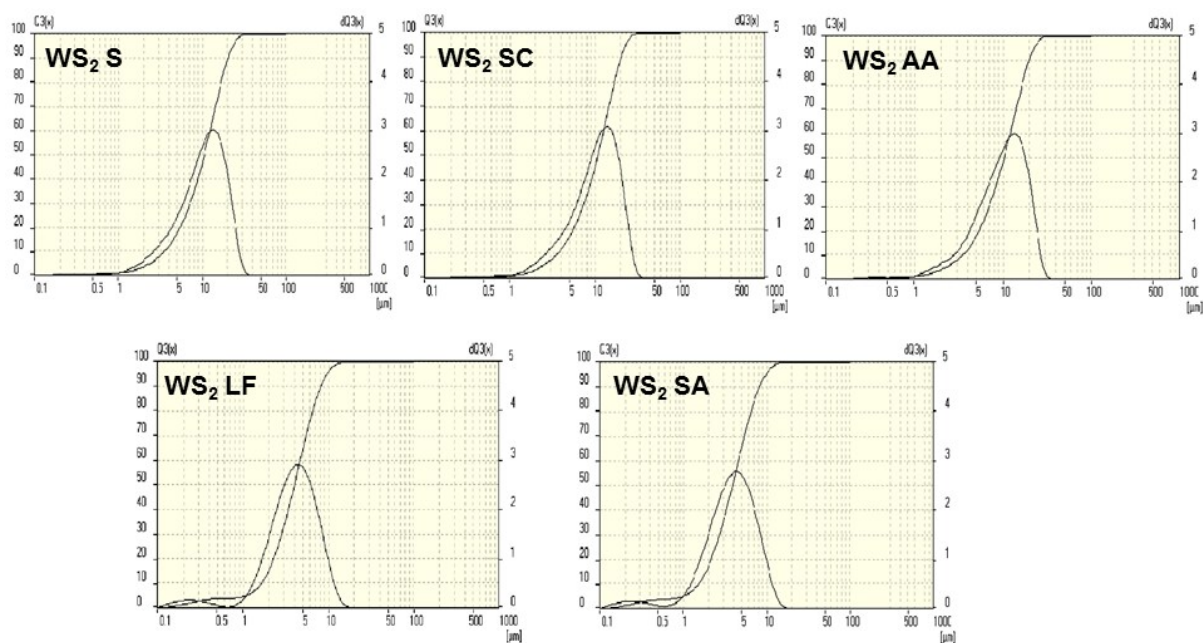

**Figure S3.** Particle size distribution of WS<sub>2</sub> obtained from different suppliers.

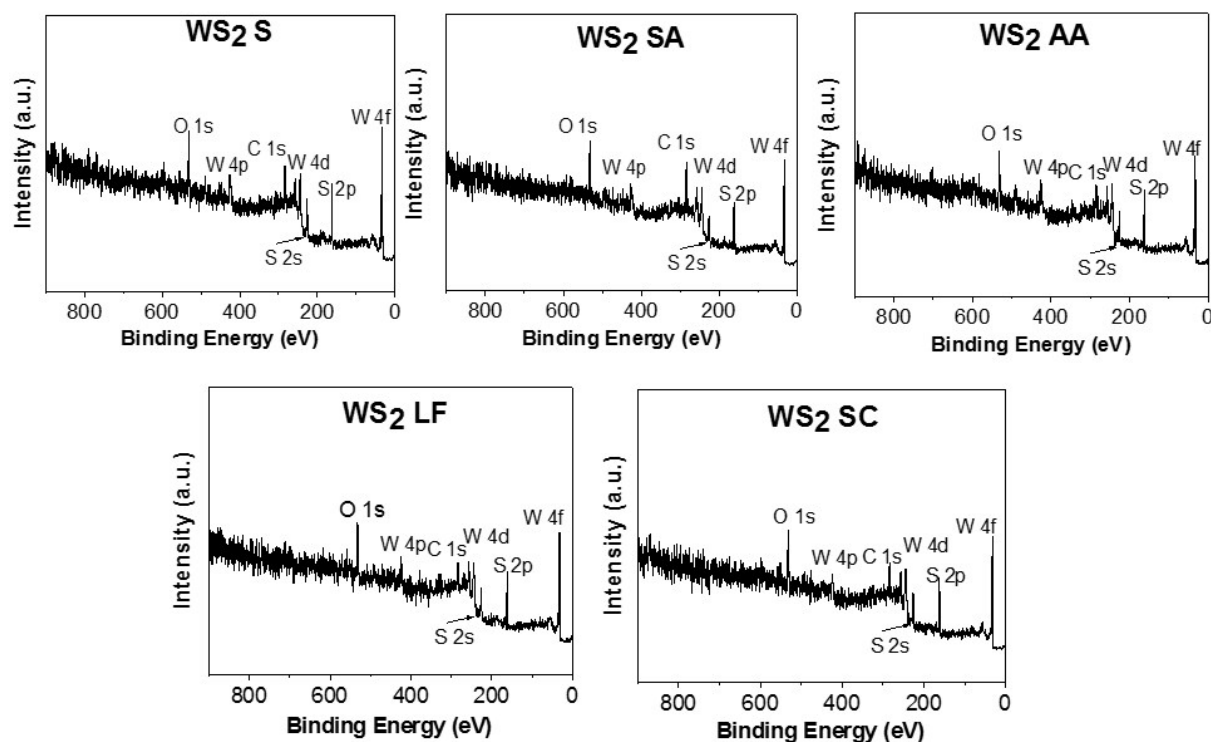

**Figure S4.** Survey spectra of WS<sub>2</sub> from different suppliers.

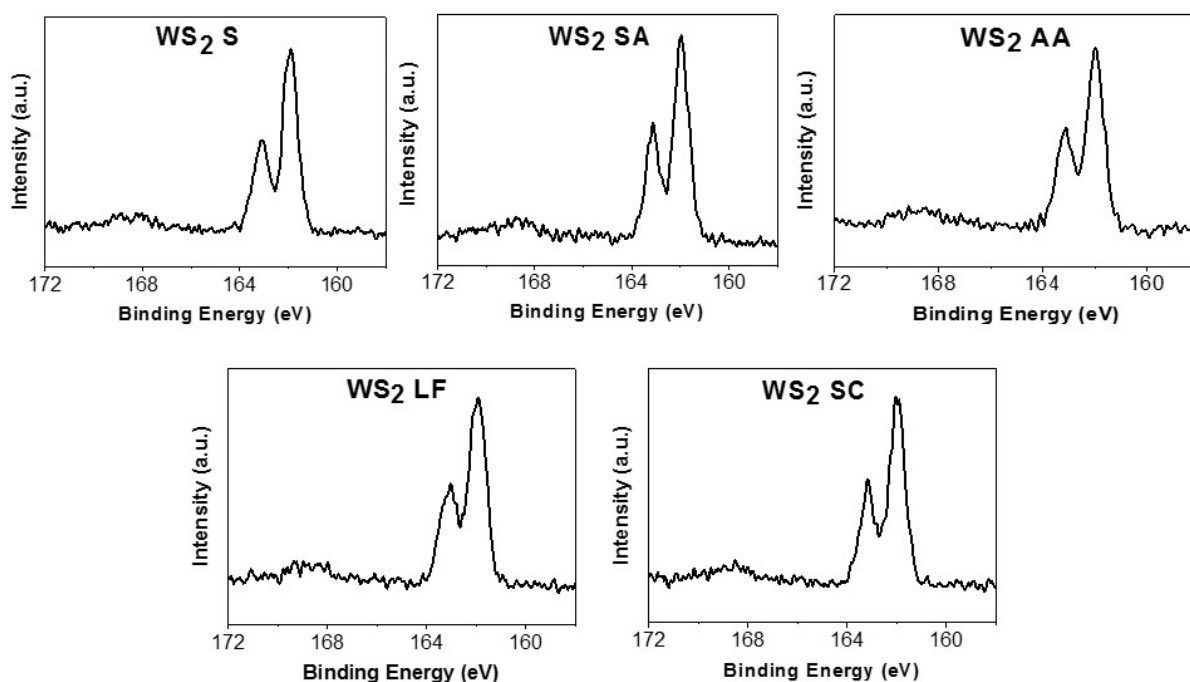

**Figure S5.** High resolution XPS spectra of S 2p peak performed on WS<sub>2</sub> from different suppliers.

**Table S2.** Respective concentrations of  $W^{4+}$  and  $W^{6+}$ .

| Sample                   | $W^{4+}$ (at. %) | $W^{6+}$ (at. %) |
|--------------------------|------------------|------------------|
| <b>WS<sub>2</sub> S</b>  | 84.0             | 16.0             |
| <b>WS<sub>2</sub> SA</b> | 89.2             | 10.8             |
| <b>WS<sub>2</sub> AA</b> | 88.0             | 12.0             |
| <b>WS<sub>2</sub> LF</b> | 85.1             | 14.9             |
| <b>WS<sub>2</sub> SC</b> | 83.3             | 16.7             |

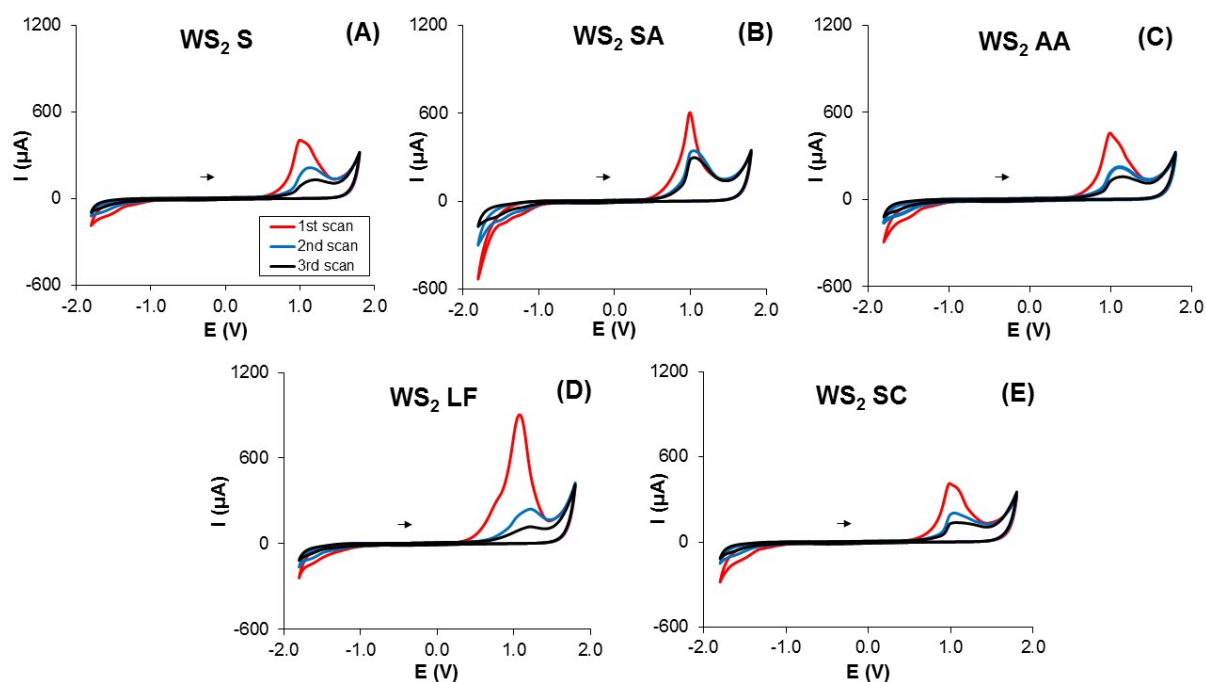

**Figure S6.** (A)-(E) Cyclic voltammograms illustrating inherent electrochemistry of bulk tungsten TMD materials from different providers, subject to 10 minutes of sonication. The first three scans are shown for comparison. All scans start at 0.0 V vs. Ag/AgCl and arrows indicate the starting scan direction. Conditions: 50 mM phosphate buffered saline (PBS) at pH 7.20 as supporting electrolyte; scan rate:  $100 \text{ mV s}^{-1}$

**Table S3.** Peak positions and current intensities of the single oxidative peaks of all five WS<sub>2</sub> materials, subject to different durations of sonication.

| Sonication Time                     |         | Material          |                    |                    |                    |                    |
|-------------------------------------|---------|-------------------|--------------------|--------------------|--------------------|--------------------|
| Peak Position<br>(V)<br>vs. Ag/AgCl |         | WS <sub>2</sub> S | WS <sub>2</sub> SA | WS <sub>2</sub> AA | WS <sub>2</sub> LF | WS <sub>2</sub> SC |
|                                     | 10 mins | 0.966             | 0.991              | 0.994              | 1.074              | 0.984              |
|                                     | 1 h     | 0.972             | 1.07               | 1.03               | 1.09               | 0.994              |
|                                     | 2 h     | 1.03              | 1.01               | 0.972              | 1.07               | 0.989              |
|                                     | 3 h     | 1.02              | 0.957              | 0.967              | 0.952              | 0.962              |
| Current<br>Intensity (μA)           | 10 mins | 329.25            | 520.90             | 381.60             | 793.87             | 337.08             |
|                                     | 1 h     | 236.95            | 895.80             | 482.89             | 936.41             | 391.96             |
|                                     | 2 h     | 468.43            | 555.59             | 253.34             | 638.30             | 425.66             |
|                                     | 3 h     | 25.46             | 111.03             | 151.18             | 96.70              | 140.65             |

**Table S4.** Calculated HET rate constants for all five bulk WS<sub>2</sub> materials. The rate constant of bare GC electrodes are included for reference.

| Sonication Time                      |         | Material          |                    |                    |                    |                    |                  |
|--------------------------------------|---------|-------------------|--------------------|--------------------|--------------------|--------------------|------------------|
| $k_{obs}^o$<br>(cm s <sup>-1</sup> ) |         | WS <sub>2</sub> S | WS <sub>2</sub> SA | WS <sub>2</sub> AA | WS <sub>2</sub> LF | WS <sub>2</sub> SC | GC               |
|                                      | 10 mins | 4.12 *            | 3.94 *             | 4.26 *             | 2.96 *             | 3.99 *             |                  |
|                                      |         | 10 <sup>-3</sup>  | 10 <sup>-3</sup>   | 10 <sup>-3</sup>   | 10 <sup>-3</sup>   | 10 <sup>-3</sup>   |                  |
|                                      |         | 2.43*             | 4.03 *             | 4.17 *             | 3.20 *             | 4.21 *             | 2.89 *           |
|                                      | 1 h     | 10 <sup>-3</sup>  | 10 <sup>-3</sup>   | 10 <sup>-3</sup>   | 10 <sup>-3</sup>   | 10 <sup>-3</sup>   | 10 <sup>-3</sup> |
|                                      |         | 3.06 *            | 4.03 *             | 4.08 *             | 2.68 *             | 3.77 *             |                  |
|                                      |         | 10 <sup>-3</sup>  | 10 <sup>-3</sup>   | 10 <sup>-3</sup>   | 10 <sup>-3</sup>   | 10 <sup>-3</sup>   |                  |
|                                      | 2 h     | 3.49 *            | 3.82 *             | 3.86 *             | 3.42 *             | 3.82 *             |                  |
|                                      |         | 10 <sup>-3</sup>  | 10 <sup>-3</sup>   | 10 <sup>-3</sup>   | 10 <sup>-3</sup>   | 10 <sup>-3</sup>   |                  |
|                                      |         | 10 <sup>-3</sup>  | 10 <sup>-3</sup>   | 10 <sup>-3</sup>   | 10 <sup>-3</sup>   | 10 <sup>-3</sup>   |                  |

**Table S5.** Average particle size for different periods of sonication measured by dynamic light scattering (DLS).

| Sample             | 10 min<br>(nm) | 1h<br>(nm) | 2h<br>(nm) | 3h<br>(nm) |
|--------------------|----------------|------------|------------|------------|
| WS <sub>2</sub> S  | 5702           | 1692       | 1804       | 2471       |
| WS <sub>2</sub> SA | 2443           | 2616       | 2163       | 2044       |
| WS <sub>2</sub> AA | 2403           | 1645       | 1367       | 3180       |
| WS <sub>2</sub> LF | 2013           | 1900       | 2358       | 1118       |
| WS <sub>2</sub> SC | 2035           | 2730       | 2328       | 2953       |

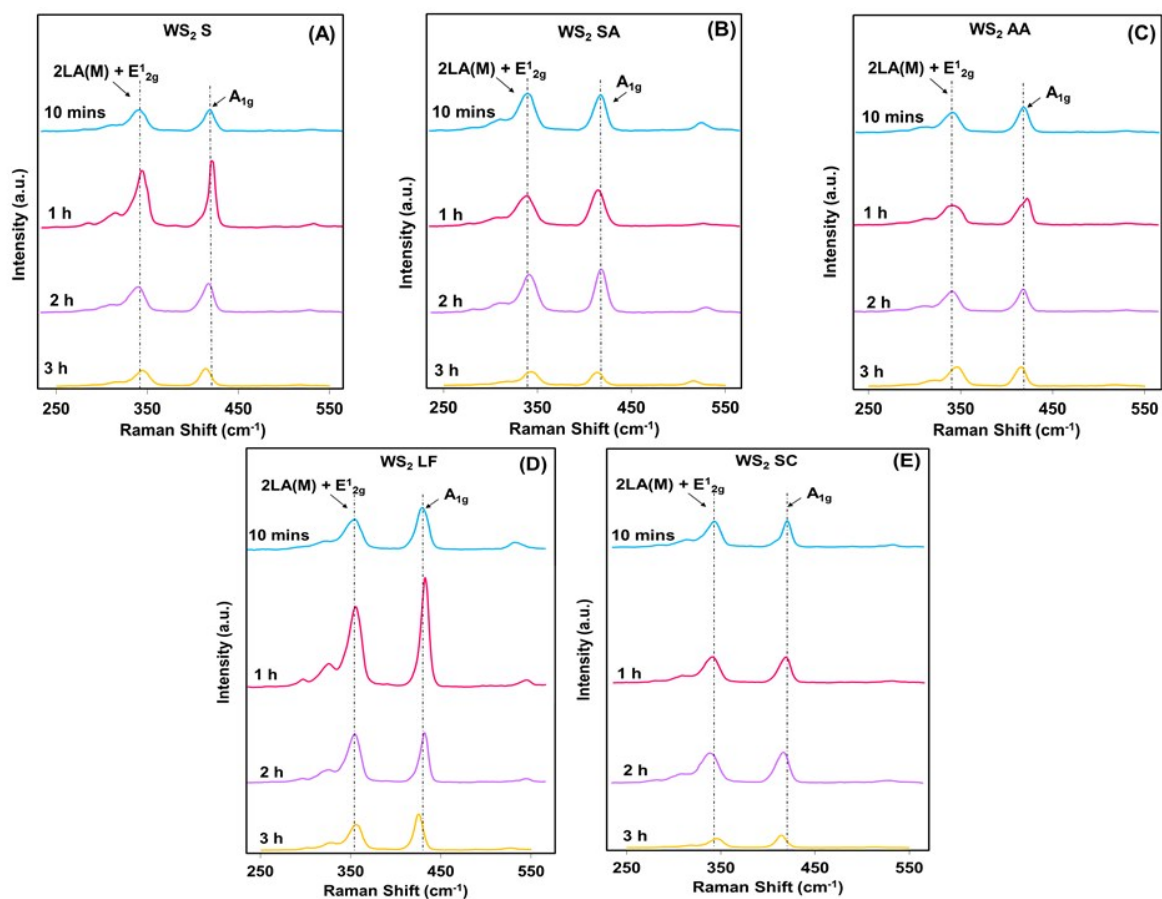

**Figure S7.** Raman spectra of WS<sub>2</sub> samples from different providers subject to different sonication times.

**Table S6.**  $E'_{2g}(\Gamma)$  and  $A_{1g}(\Gamma)$  peak signals from Raman spectra of  $WS_2$  samples from different providers subject to different sonication times.

|                             | Raman Shift ( $cm^{-1}$ ) |                          |                           |                          |                           |                          |                           |                          |
|-----------------------------|---------------------------|--------------------------|---------------------------|--------------------------|---------------------------|--------------------------|---------------------------|--------------------------|
|                             | Sonication time           |                          |                           |                          |                           |                          |                           |                          |
|                             | 10 mins                   |                          | 1 h                       |                          | 2 h                       |                          | 3 h                       |                          |
|                             | $E'_{2g}$<br>( $\Gamma$ ) | $A_{1g}$<br>( $\Gamma$ ) |
| <b><math>WS_2</math> S</b>  | 346.51                    | 418.60                   | 348.84                    | 418.60                   | 346.51                    | 416.28                   | 344.19                    | 413.95                   |
| <b><math>WS_2</math> SA</b> | 346.51                    | 416.28                   | 344.19                    | 413.95                   | 344.19                    | 413.95                   | 344.19                    | 413.95                   |
| <b><math>WS_2</math> AA</b> | 346.51                    | 416.28                   | 348.84                    | 420.93                   | 346.51                    | 416.28                   | 346.51                    | 416.28                   |
| <b><math>WS_2</math> LF</b> | 359.13                    | 426.22                   | 359.13                    | 428.53                   | 356.81                    | 428.53                   | 356.81                    | 426.22                   |
| <b><math>WS_2</math> SC</b> | 348.84                    | 418.60                   | 346.51                    | 416.28                   | 344.19                    | 416.28                   | 346.51                    | 413.95                   |
